# Supplementary material for: Short tandem repeat polymorphism in the promoter region of cyclophilin 19B drives its transcriptional upregulation and contributes to drug resistance in the malaria parasite Plasmodium falciparum
Source: PubMed Central journal article supplement (PMC9901795; doi:10.1371/journal.ppat.1011118), 2023-01-25

## Supplementary Images

Full unprocessed western blot images used in the study

### a) Western Blots Fig 2A

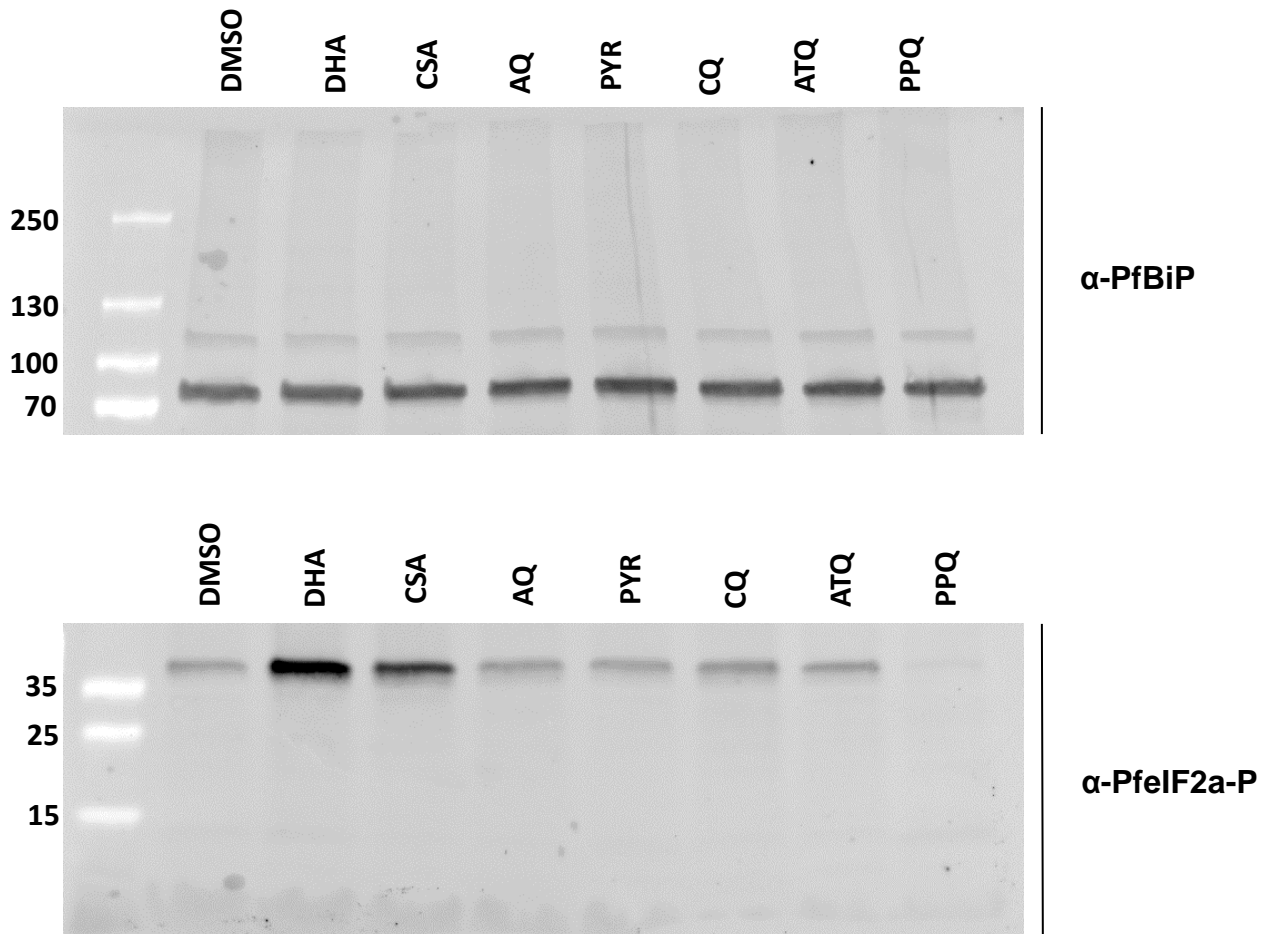

b) Western Blots Fig 2B

Replicate 1

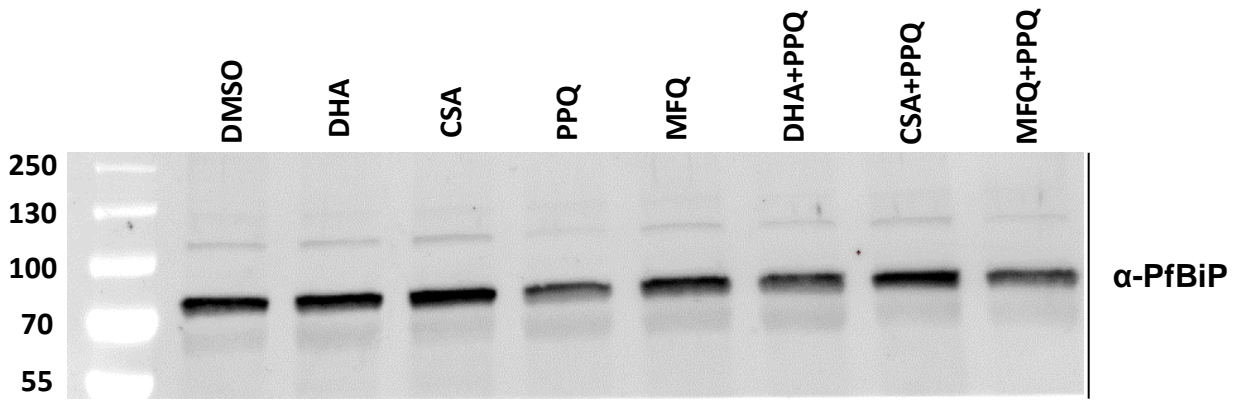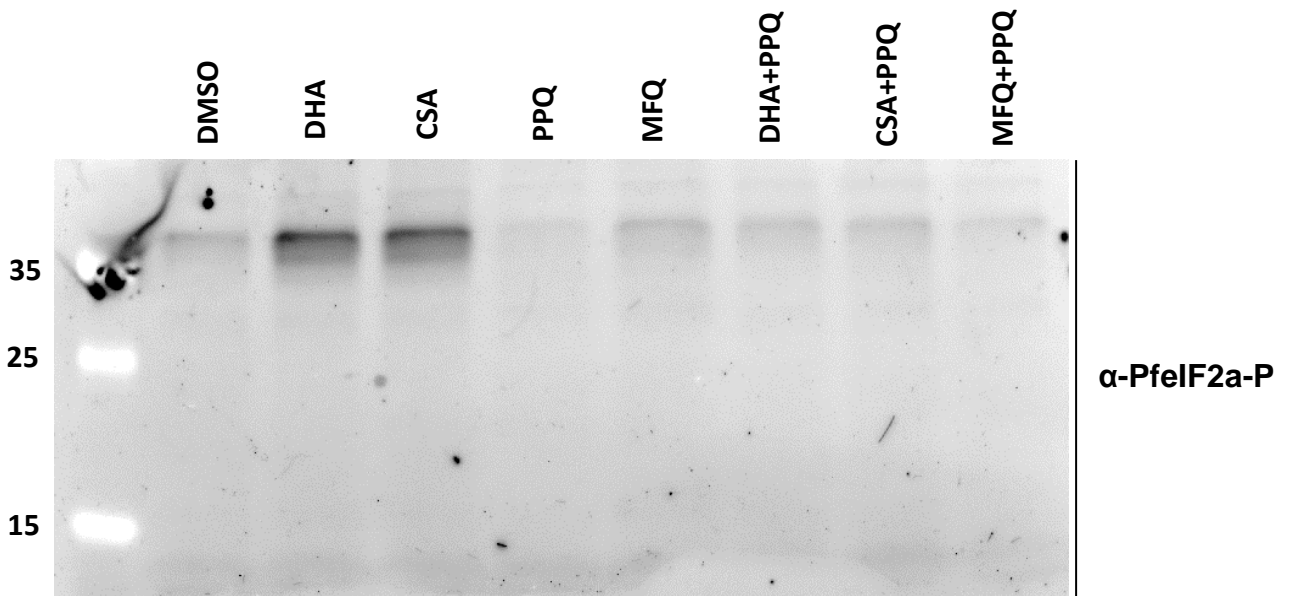

Replicate 2

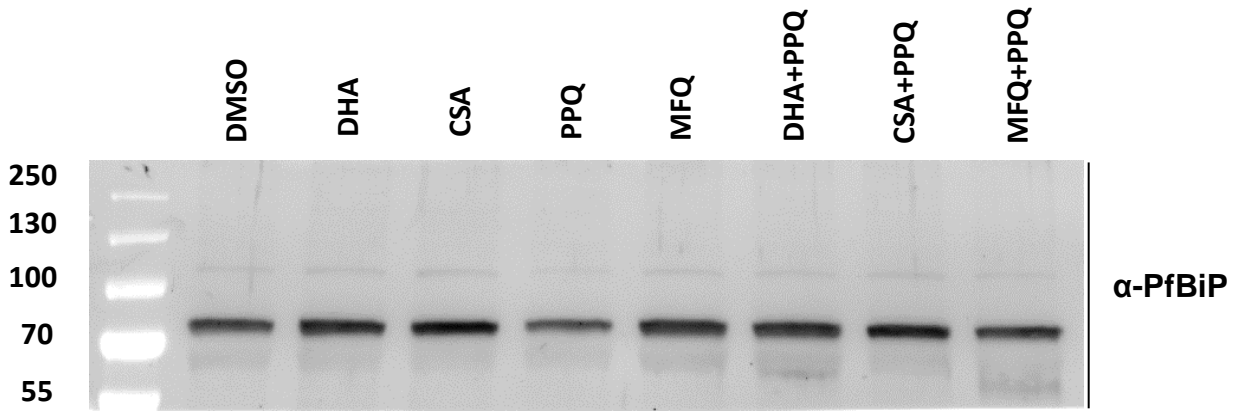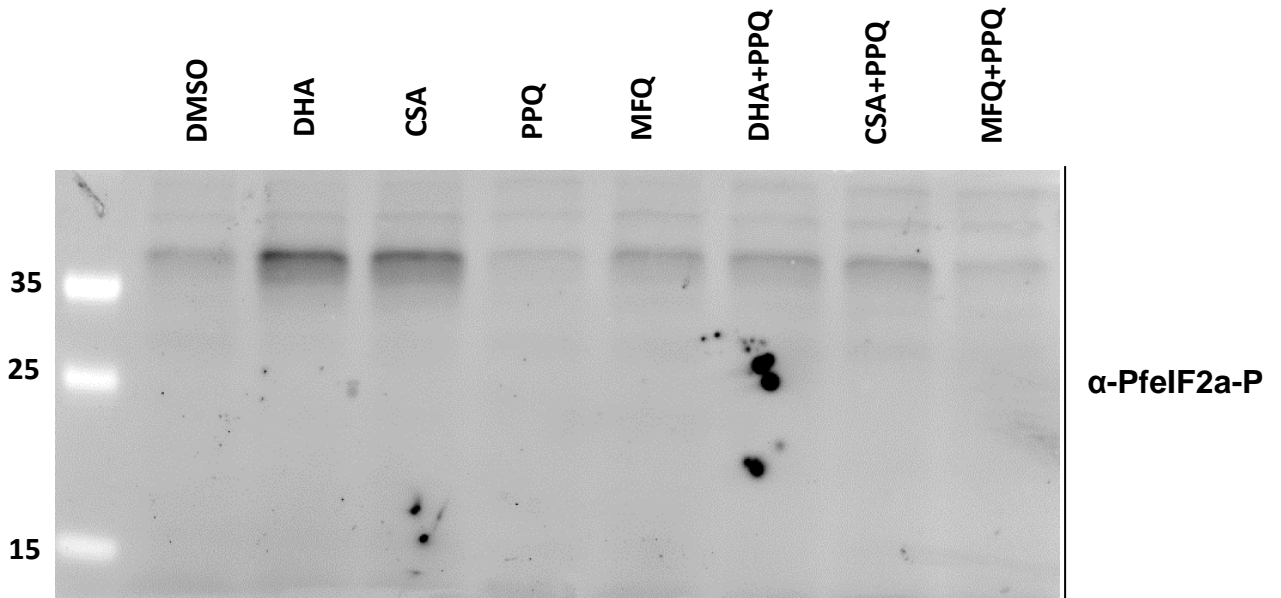

Replicate 3

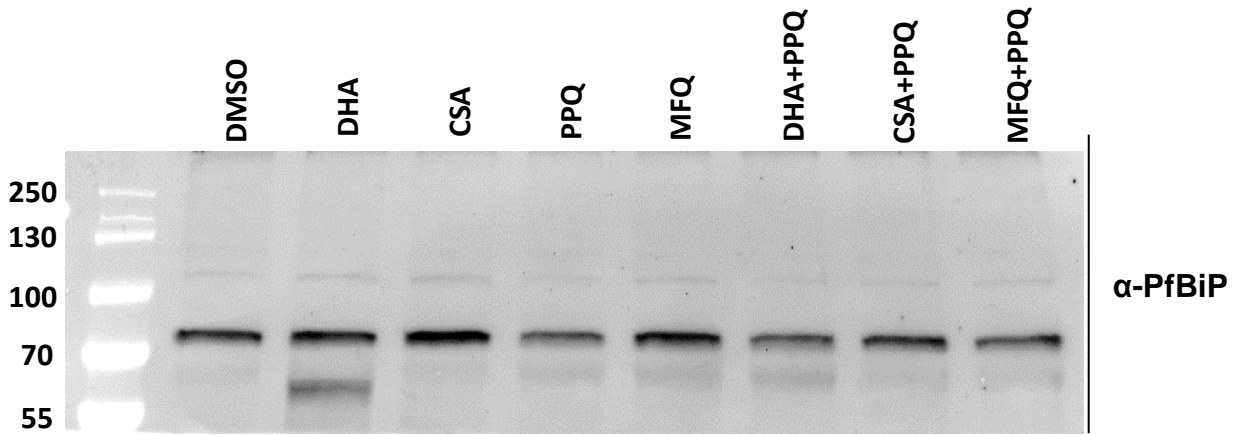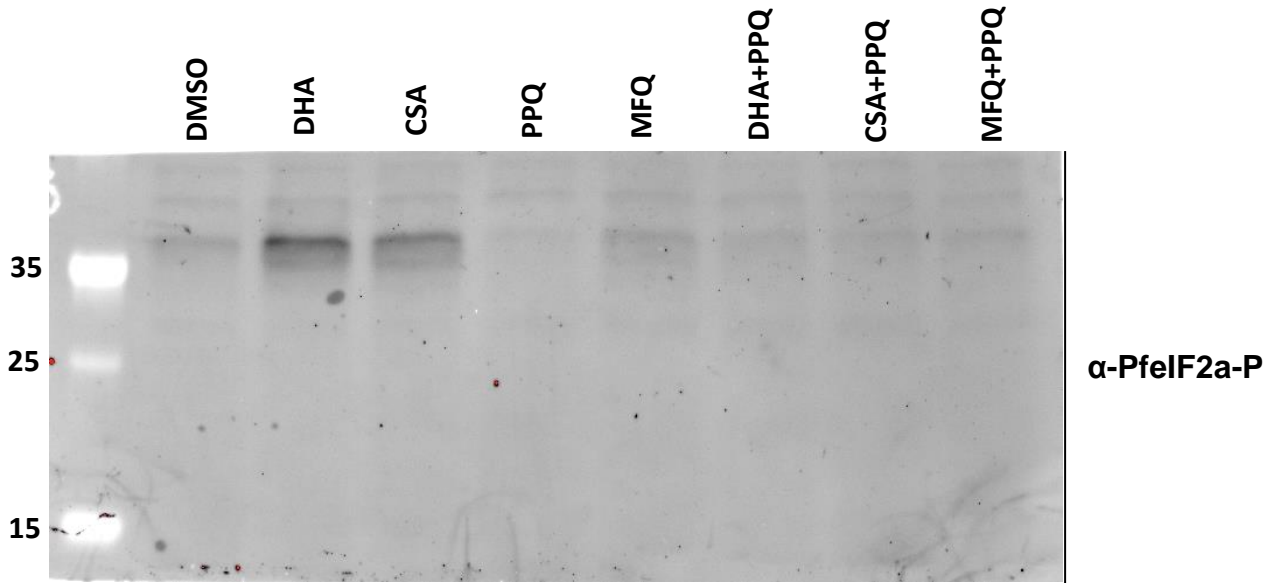

c) Western Blots Fig 2C (right panel)

Replicate 1

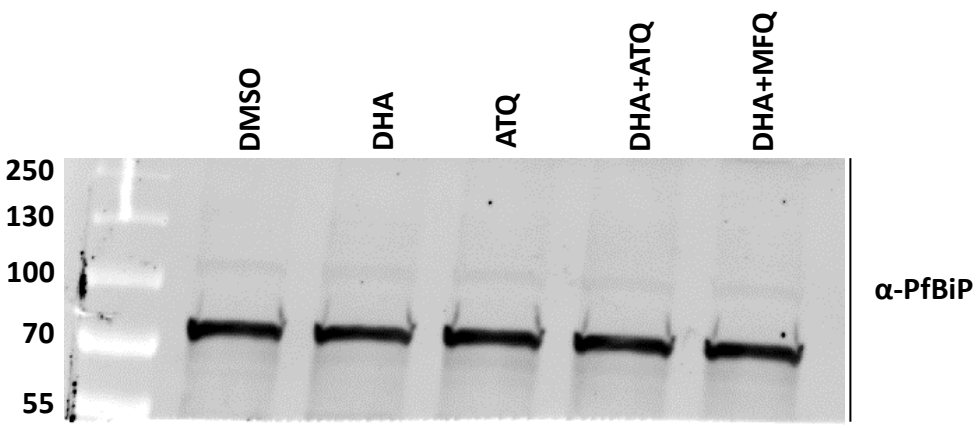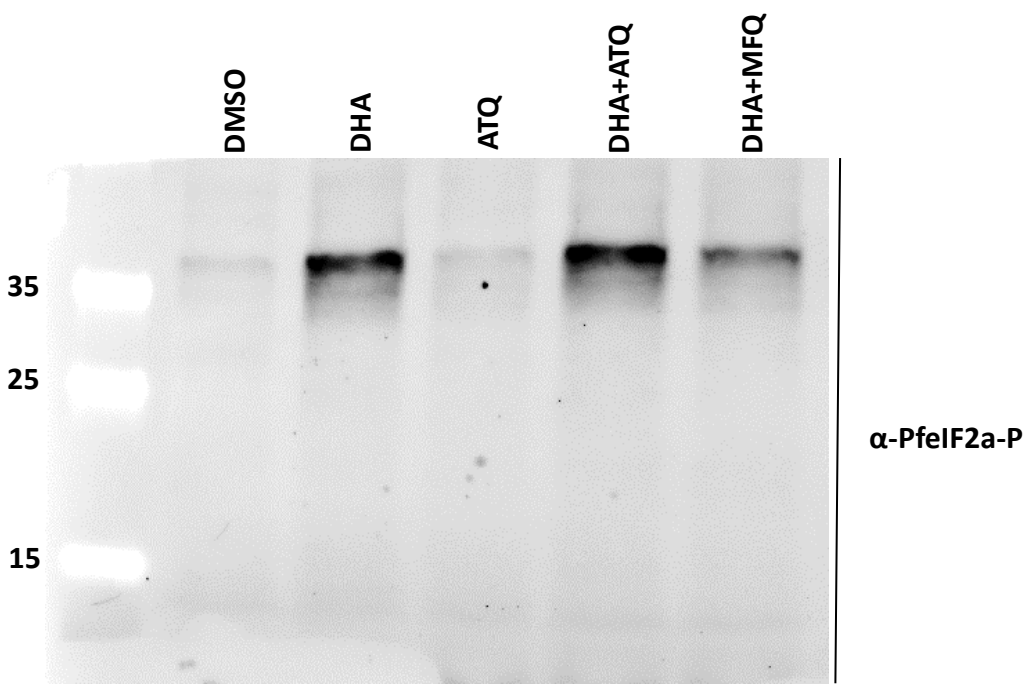

Replicate 2

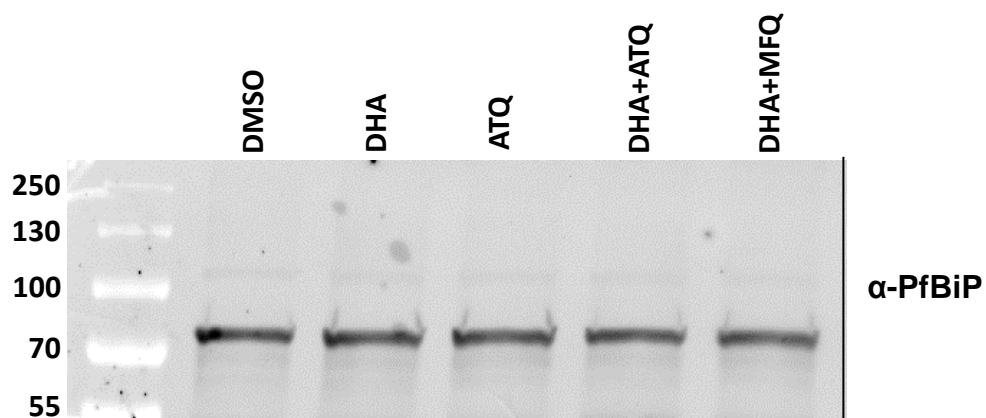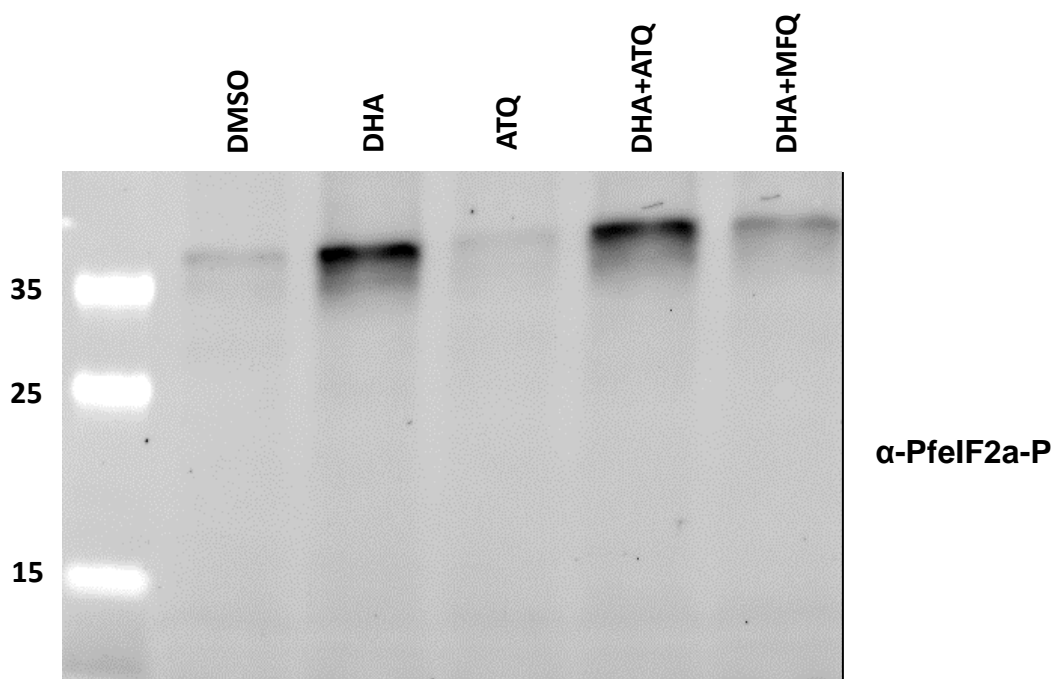

Replicate 3

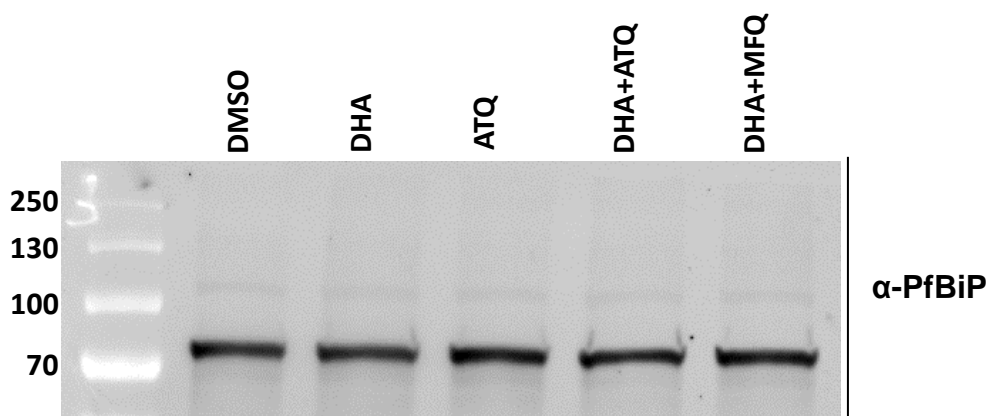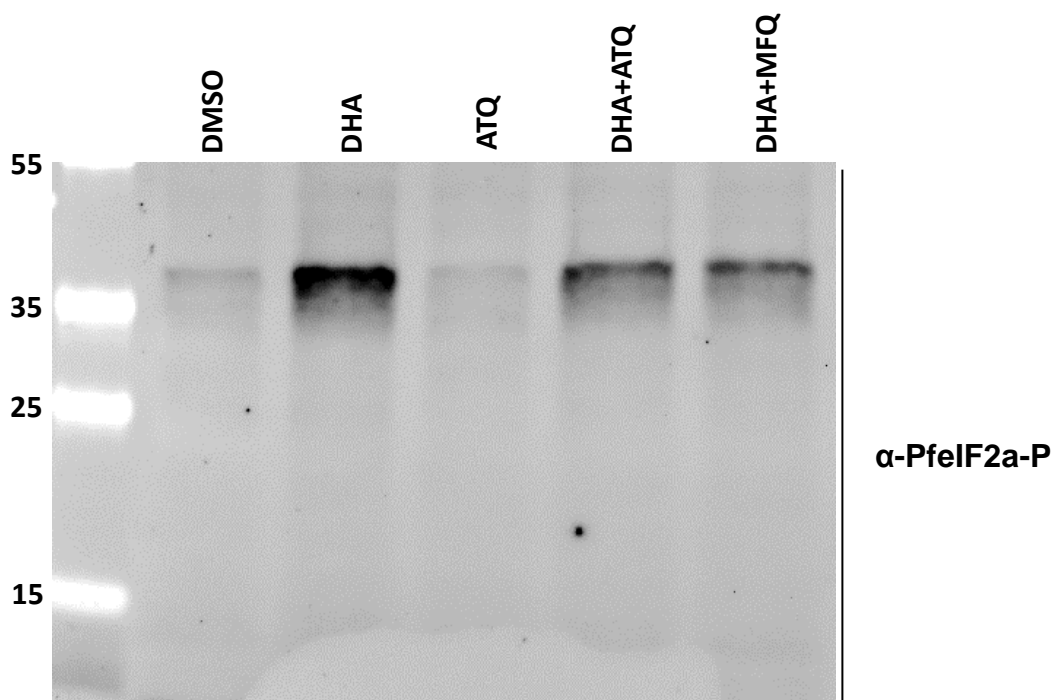

d) Western Blots Fig 2C (left panel)

Replicate 1

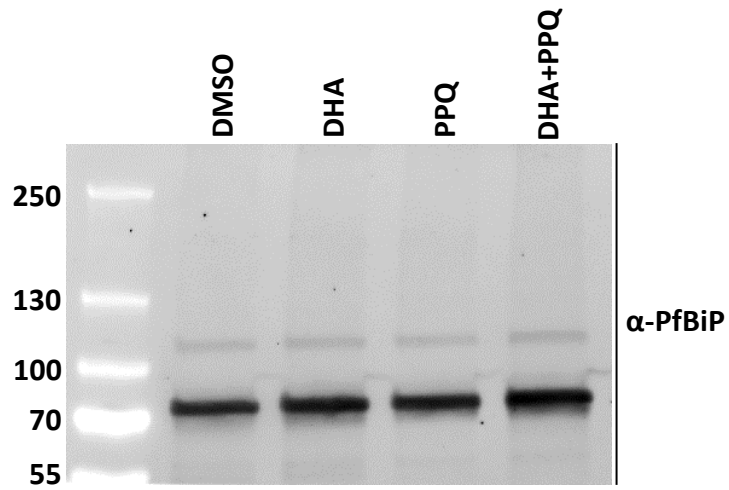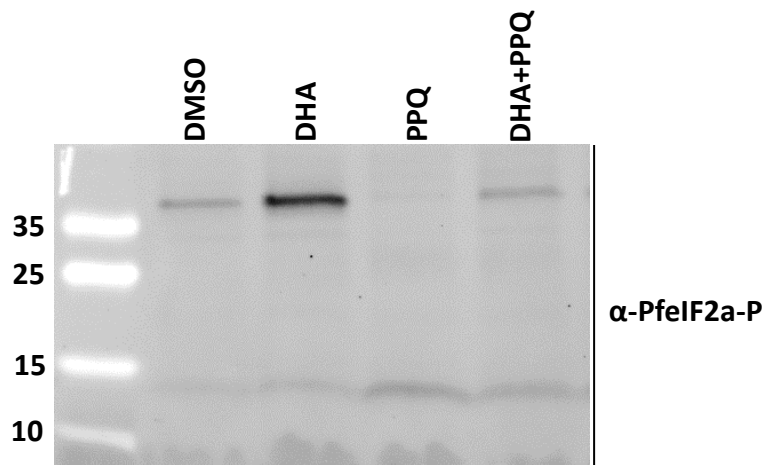



Replicate 2

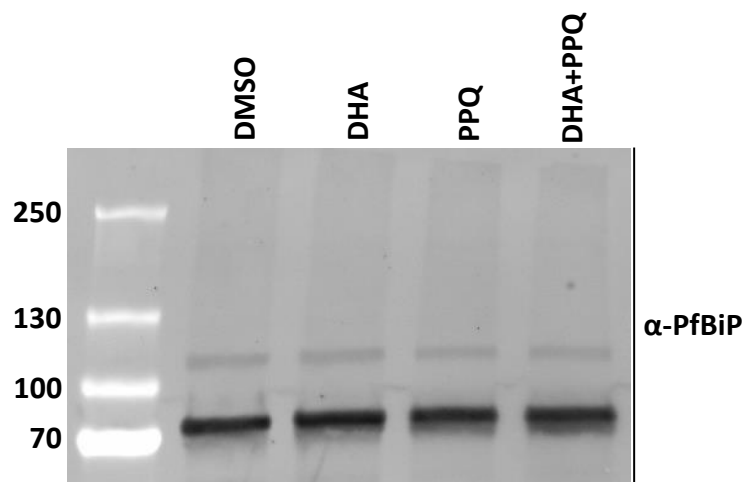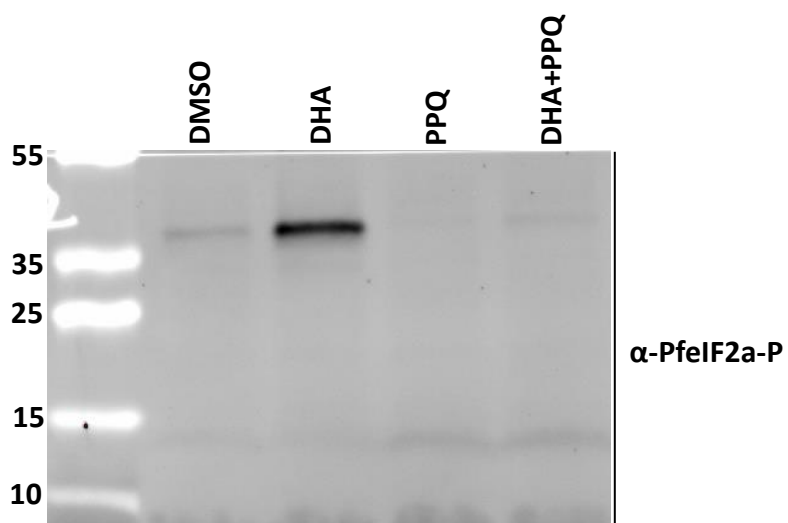

Replicate 3

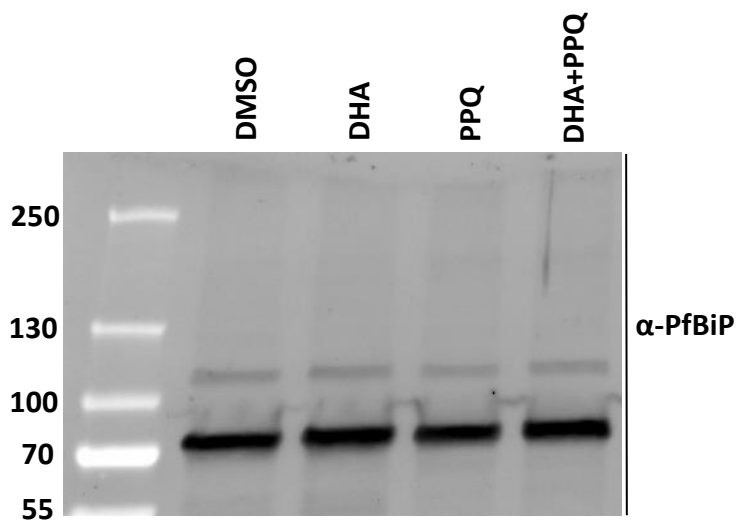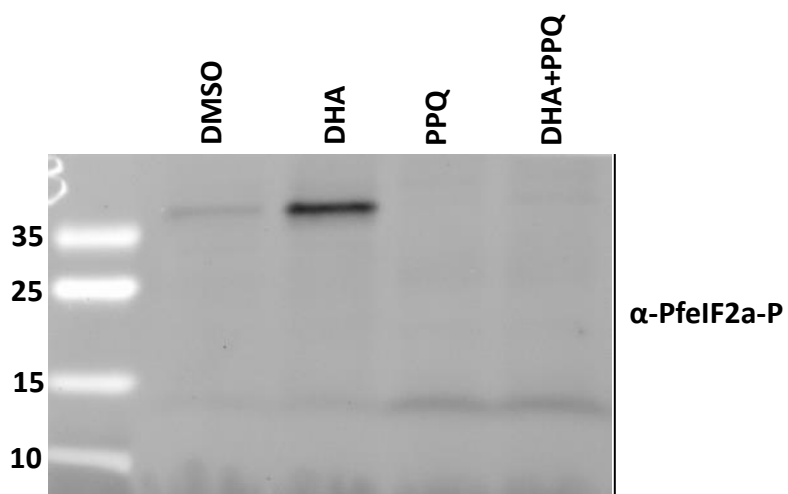

e) Western Blots Fig 2D

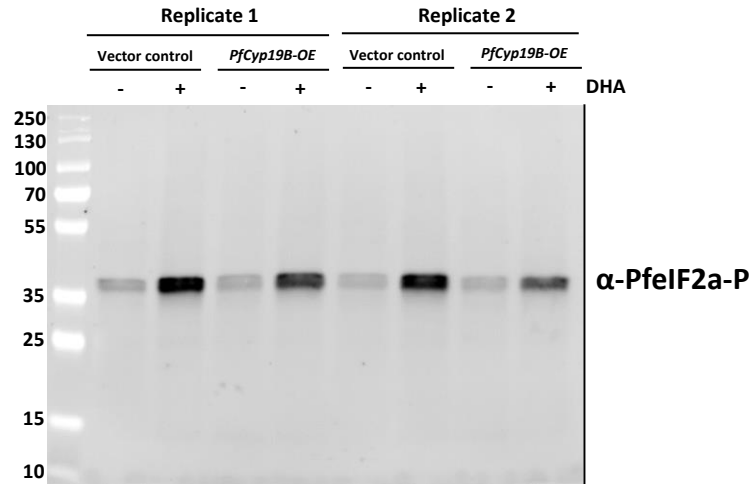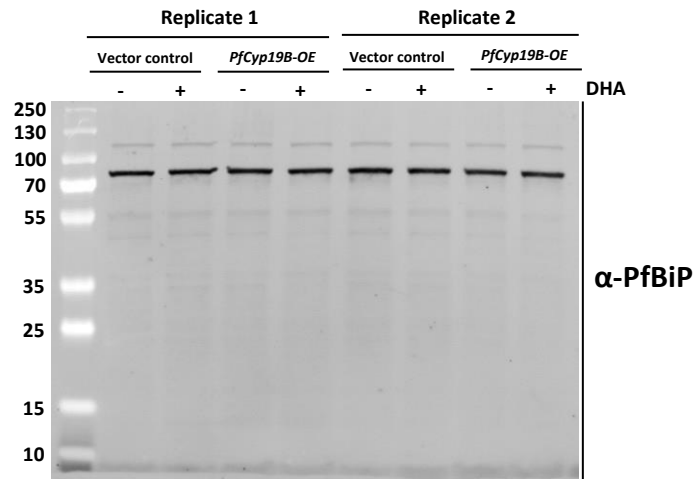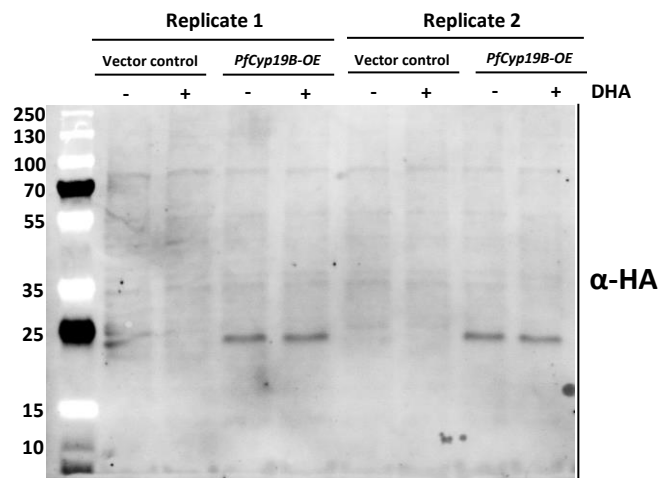

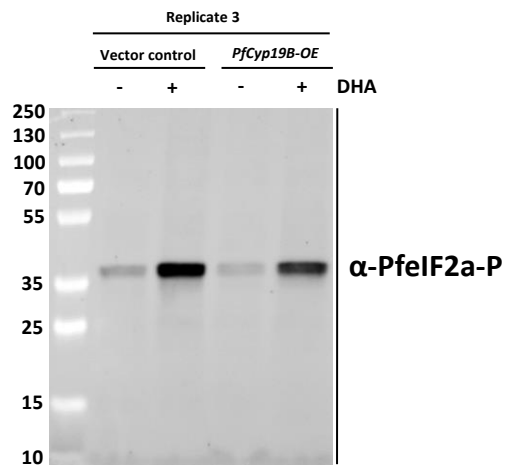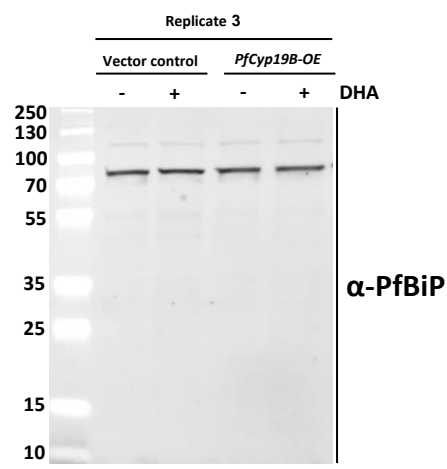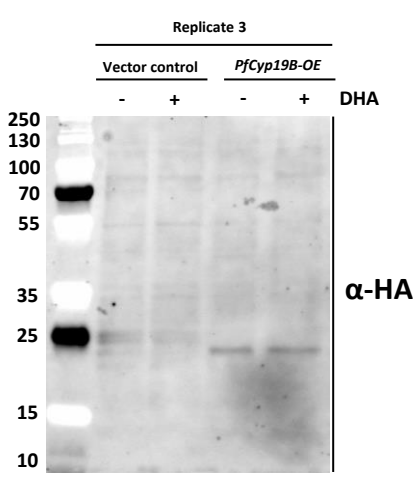

f) Western Blots Fig 2E

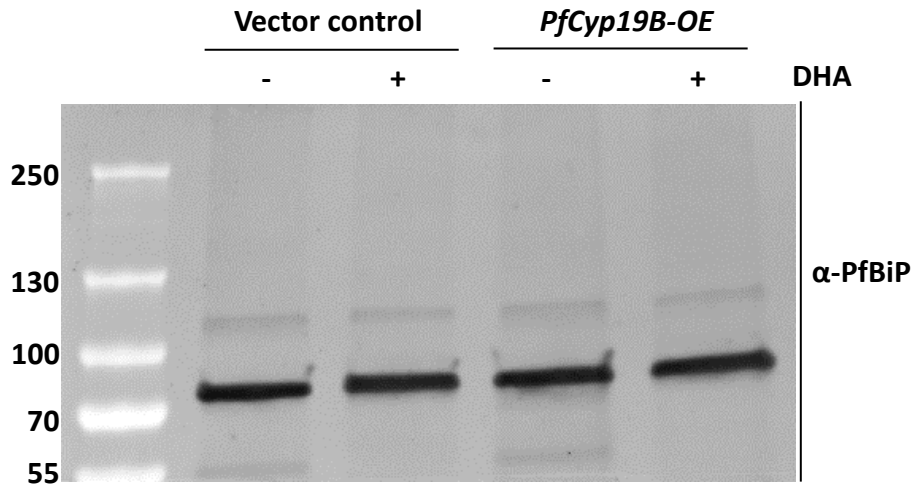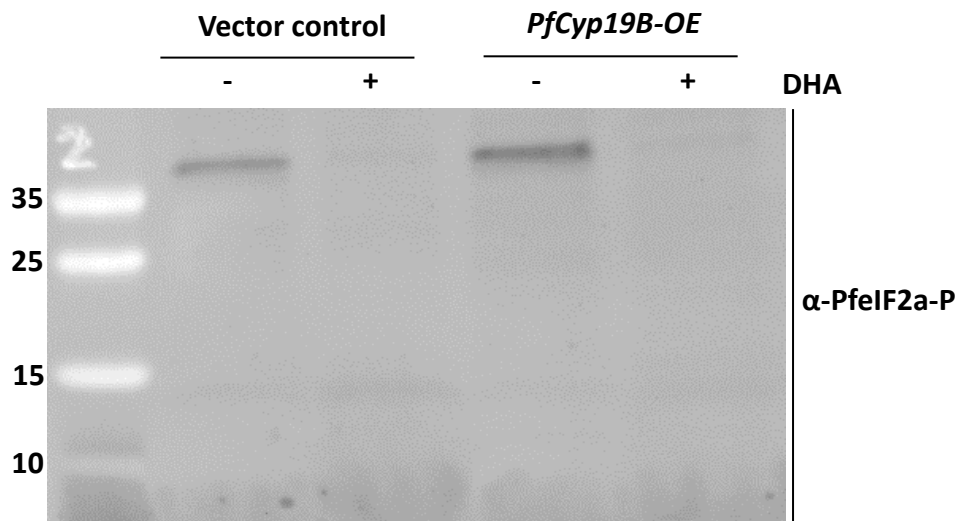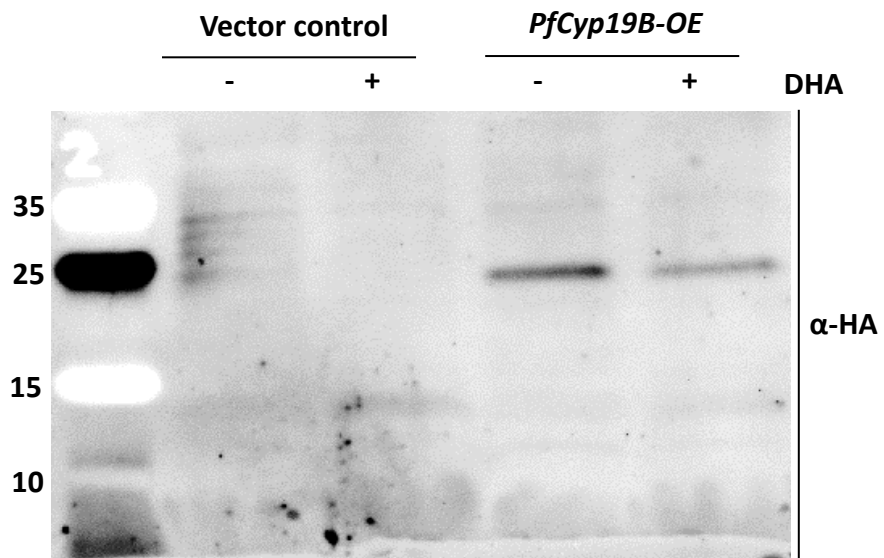

g) Western Blots S4 Fig (gradient)

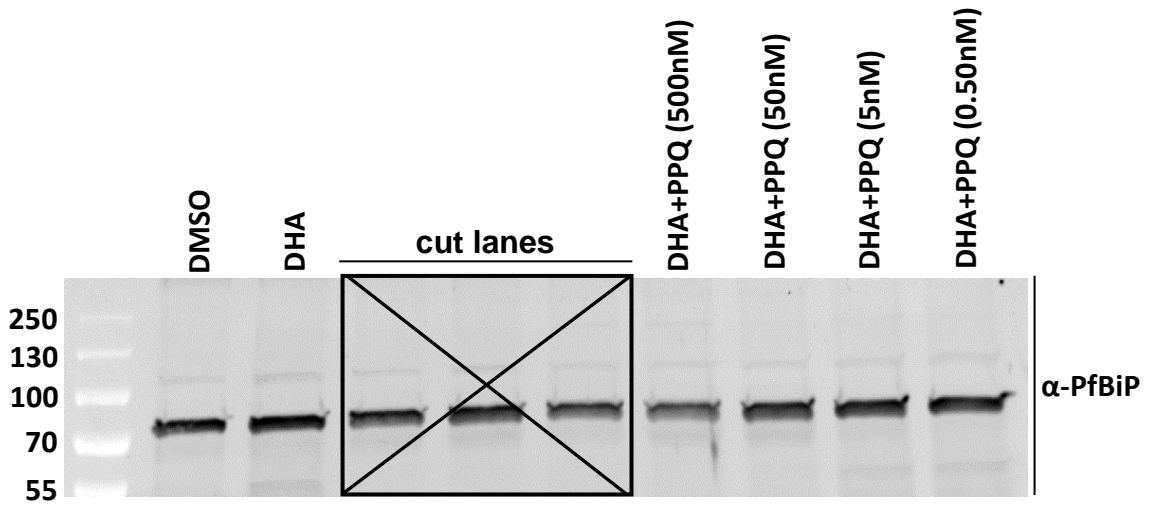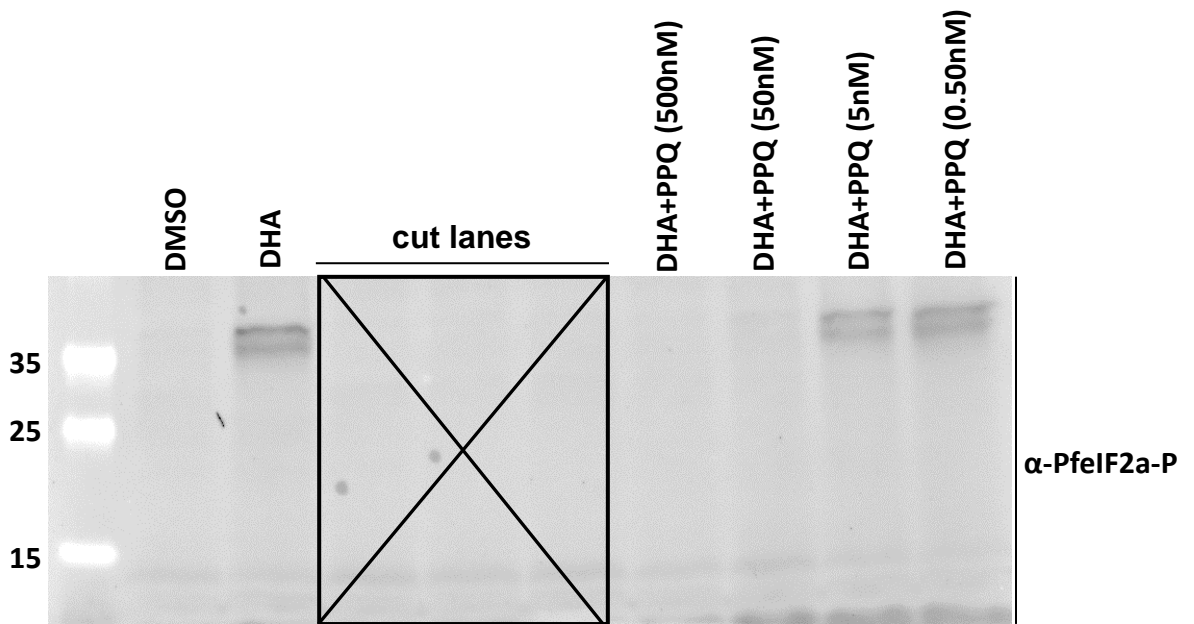

g) Western Blots Fig 3C

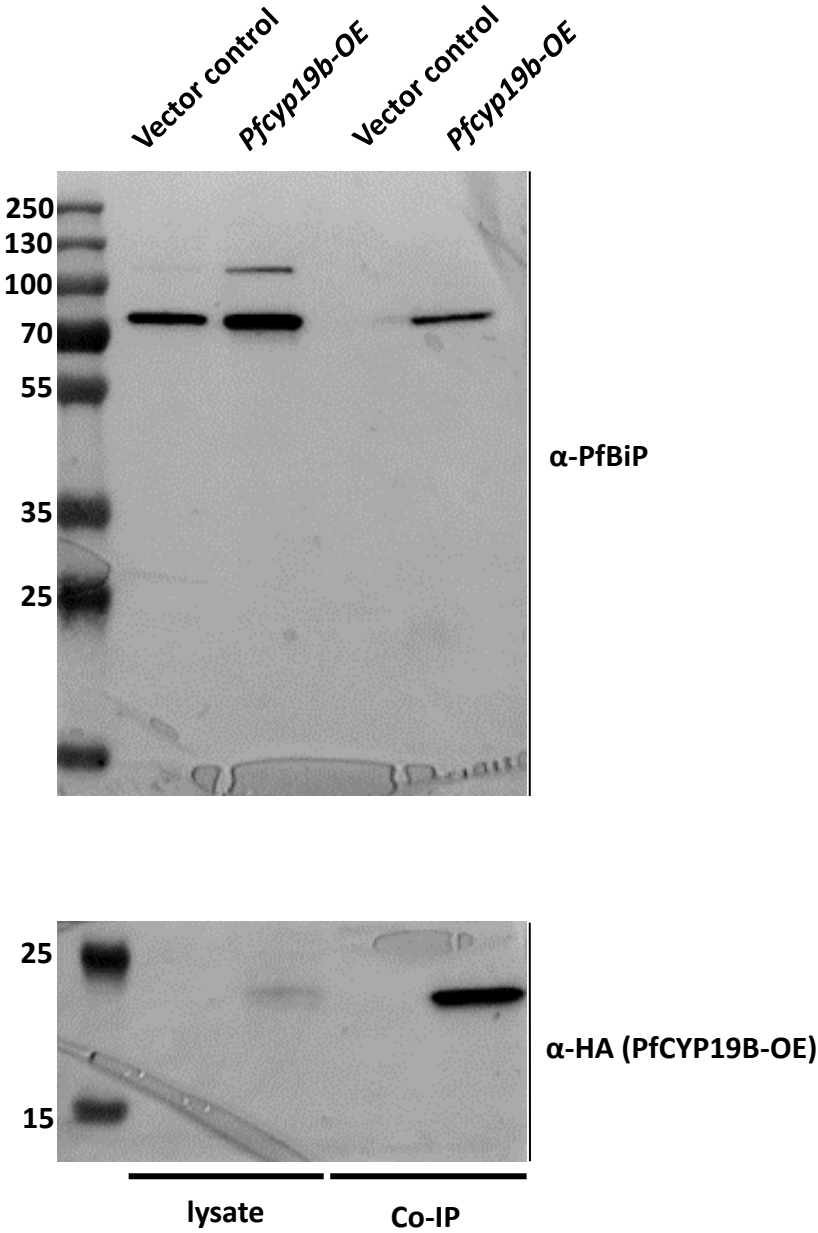

Supplement: ppat.1011118.s014.pdf [file ppat.1011118.s014.pdf]
